# Supplementary material for: Modulation of IGF2 Expression in the Murine Thymus and Thymic Epithelial Cells Following Coxsackievirus-B4 Infection
Source: PubMed Central journal article supplement (PMC7919294; doi:10.3390/microorganisms9020402), 2021-02-15
Supplement: microorganisms-09-00402-s001.pdf [file microorganisms-09-00402-s001.pdf]

Supplementary data

# Modulation of IGF2 expression in the murine thymus and Thymic Epithelial Cells Following Coxsackievirus-B4 Infection

Hélène Michaux<sup>1</sup>, Aymen Halouani<sup>2</sup>, Charlotte Trussart<sup>1</sup>, Chantal Renard<sup>1</sup>, Hela Jaïdane<sup>2</sup>, Henri Martens<sup>1</sup>, Vincent Geenen<sup>1\*†</sup>, Didier Hober<sup>3\*†</sup>

<sup>1</sup> GIGA-I3 Center of Immunoendocrinology, GIGA Research Institute, University of Liège, 4000 Liège, Belgium; hmichaux88@gmail.com (H.M.); charlotte.trussart@uliege.be (C.T.); ach.charlet@outlook.be (C.R.); hmartens@uliege.be (H.M.)

<sup>2</sup> Laboratoire des Maladies Transmissibles et Substances Biologiquement Actives LR99ES27, Université El Manar (Tunis) and Université de Monastir, 5000 Monastir, Tunisia; halouani.aymen@yahoo.com (A.H.); jaidanehela@yahoo.fr (H.J.)

<sup>3</sup> Laboratoire de Virologie ULR3610, Université de Lille CHU Lille, F-59000 Lille, France

\* Correspondence: didier.hober@chru-lille.fr (D.H.) ; vgeenen@uliege.be (V.G.)

† These senior coauthors contributed equally to the manuscript.

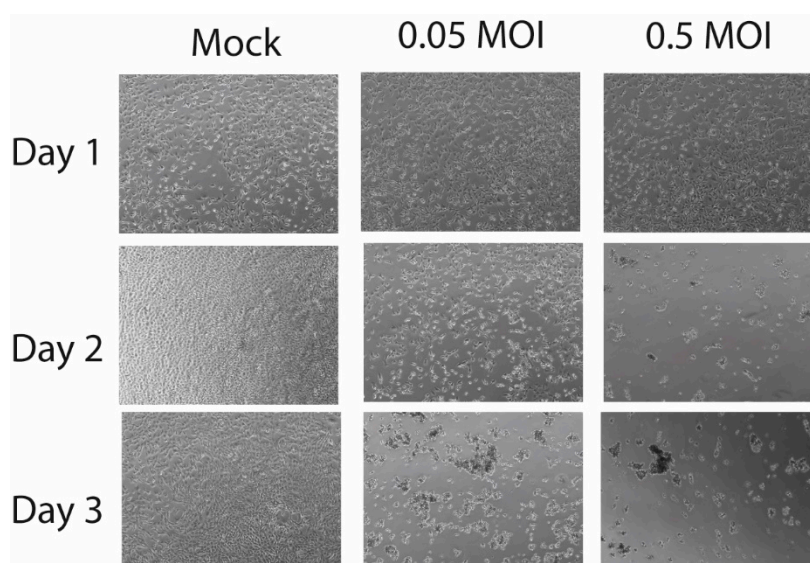

**Figure 1.** Microscopic examination of mock- and Coxsackievirus B4 (CV-B4)-infected MTE4-14 cells 1–3 days postinfection (P.I.).

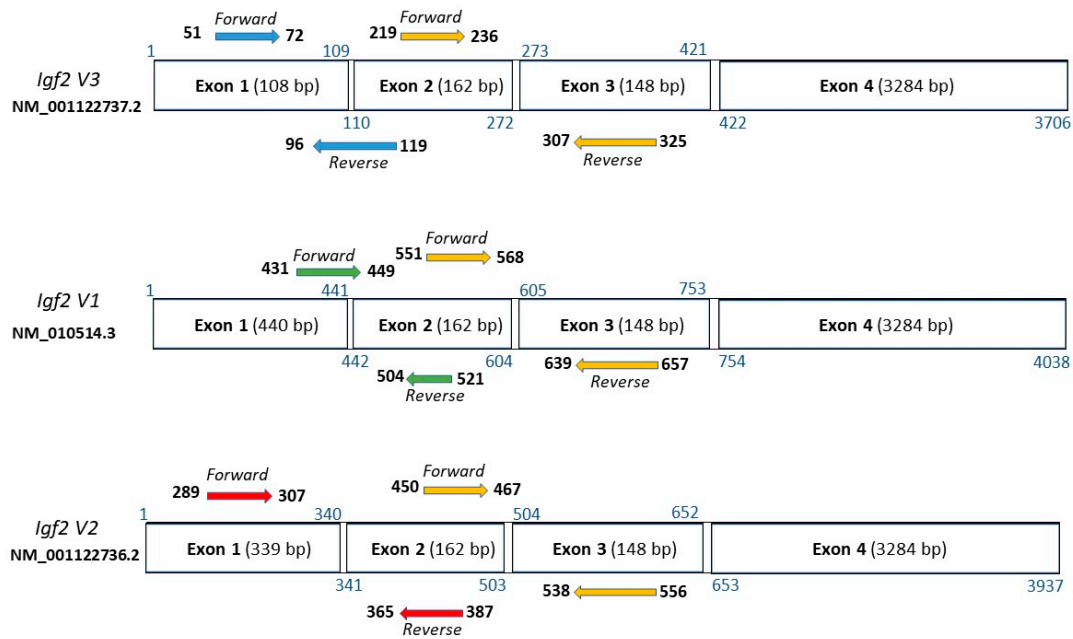

**Figure 2. A.** Primer localization in insulin-like growth factor 2 (Igf2) mRNA transcripts. Blue arrows indicate forward and reverse primer localization for *Igf2* V3, green arrows indicate forward and reverse primer localization for *Igf2* V1, red arrows indicate forward and reverse primer localization for *Igf2* V2 and orange arrows indicate forward and reverse primer localization for *total Igf2* detection on each transcript. *Igf2* V1, V2 and V3 exon sizes are indicated in base pair (bp). Blue numbers indicate nucleotide number. NCBI transcript accession number is indicated in bold type under the name of each transcript.

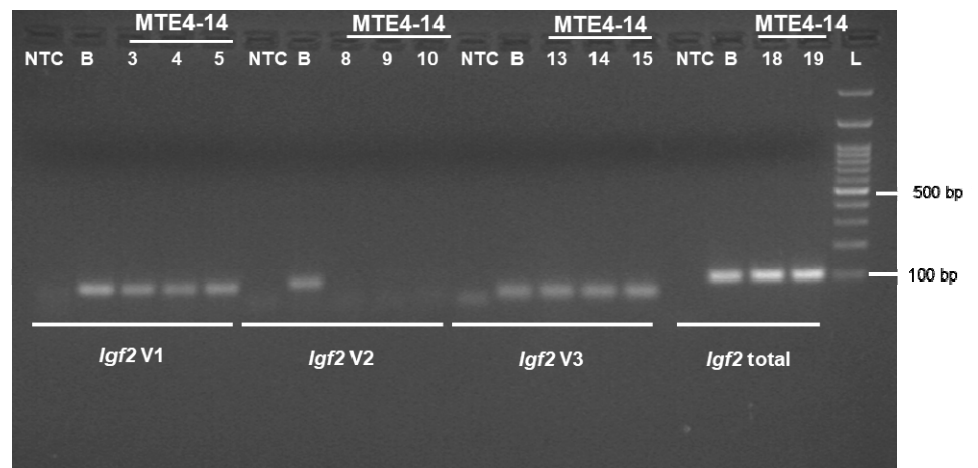

**Figure 2. B.** Uncropped whole PCR gel for Figure 1A. NTC, no template control. B, brain positive control. Lanes 3–5, 8–10, and 18–19, MTE4-14 cells. L, O’GeneRuler 100 bp DNA ladder. **Weak band in no template control (50 bp) is primer dimers amplification.**

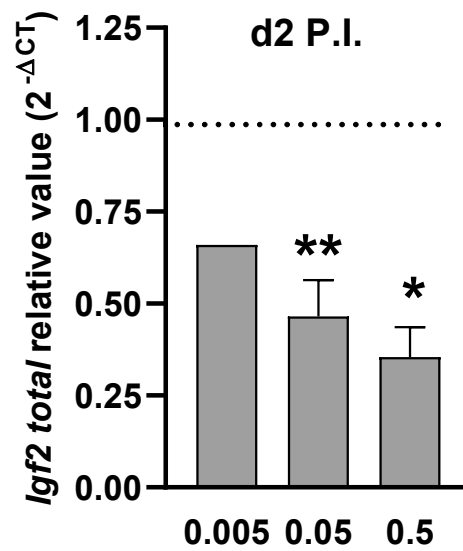

**Figure 3. A.** Relative mRNA expression of the *total Igf2* mRNA in CV-B4-infected cells (multiplicity of infection (MOI) = 0.005 to MOI = 0.5) 2 days P.I. **Data are represented as mean of 2<sup>-ΔCT</sup> ± SEM.** Mock samples are represented as a dashed line set at y = 1. MOI = 0.005, n = 1; MOI = 0.05, n = 12; MOI = 0.5, n = 4. Ratio paired *t*-test, \**p* < 0.05 and \*\**p* < 0.01.

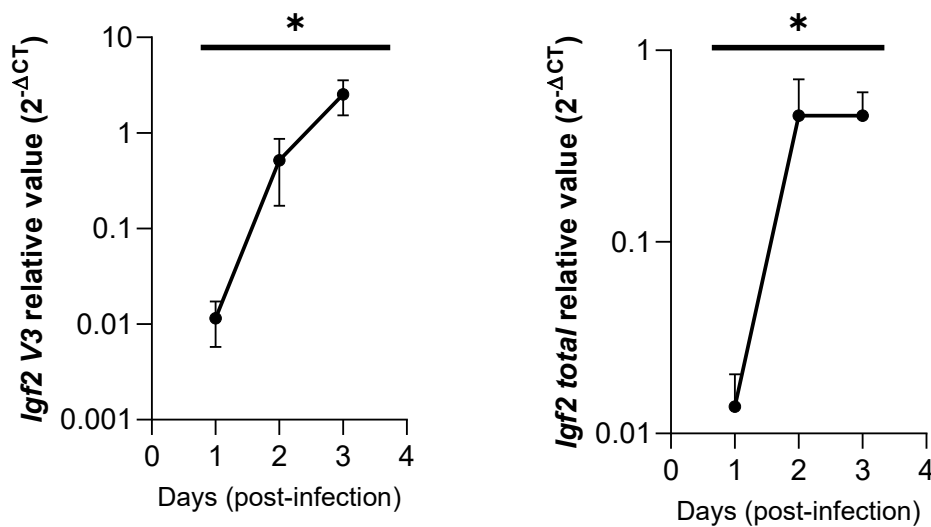

**Figure 3. B.** Relative mRNA expression of *Igf2 V3* and total *Igf2* mRNA in mock-infected MTE4-14 cells 1, 2, and 3 days P.I. **Data are represented as mean of 2<sup>-ΔCT</sup> ± SEM; n = 5–10, Welch’s ANOVA test.** \**p* < 0.05.

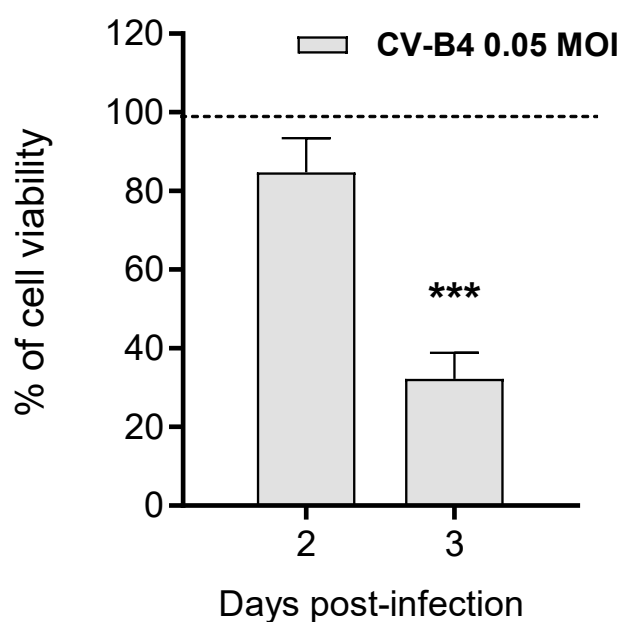

**Figure 3.** C. 3-(4,5-Dimethyl-2-thiazolyl)-2,5-diphenyl-2H-tetrazolium bromide reagent (MTT) cell viability assay analysis on day 2 and 3 P.I. CV-B4-infected cells relative to matched mock-infected cells (represented as a dashed line set at  $y = 100$ ) are shown. Data are represented as the mean of fold change  $\pm$  SEM;  $n = 7-11$ , ratio paired  $t$  test,  $***p < 0.001$ .

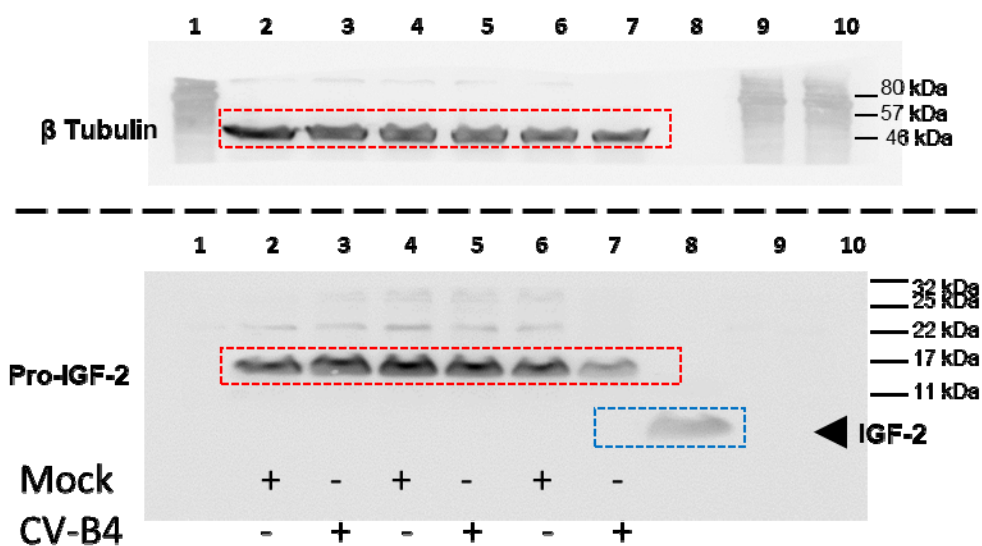

**Figure S3D.** Full-length Western blot for Figure 2C. Membranes were cut horizontally into two parts prior to immunostaining for  $\beta$ -tubulin and IGF-2. Lanes 1, 9, and 10, Color-coded Prestained Protein Marker, Broad Range (11–250 kDa). Lanes 2, 4, 6: mock-infected cells; Lanes 3, 5, and 7: CV-B4 infected cells. Lane 8, IGF-2 positive control.

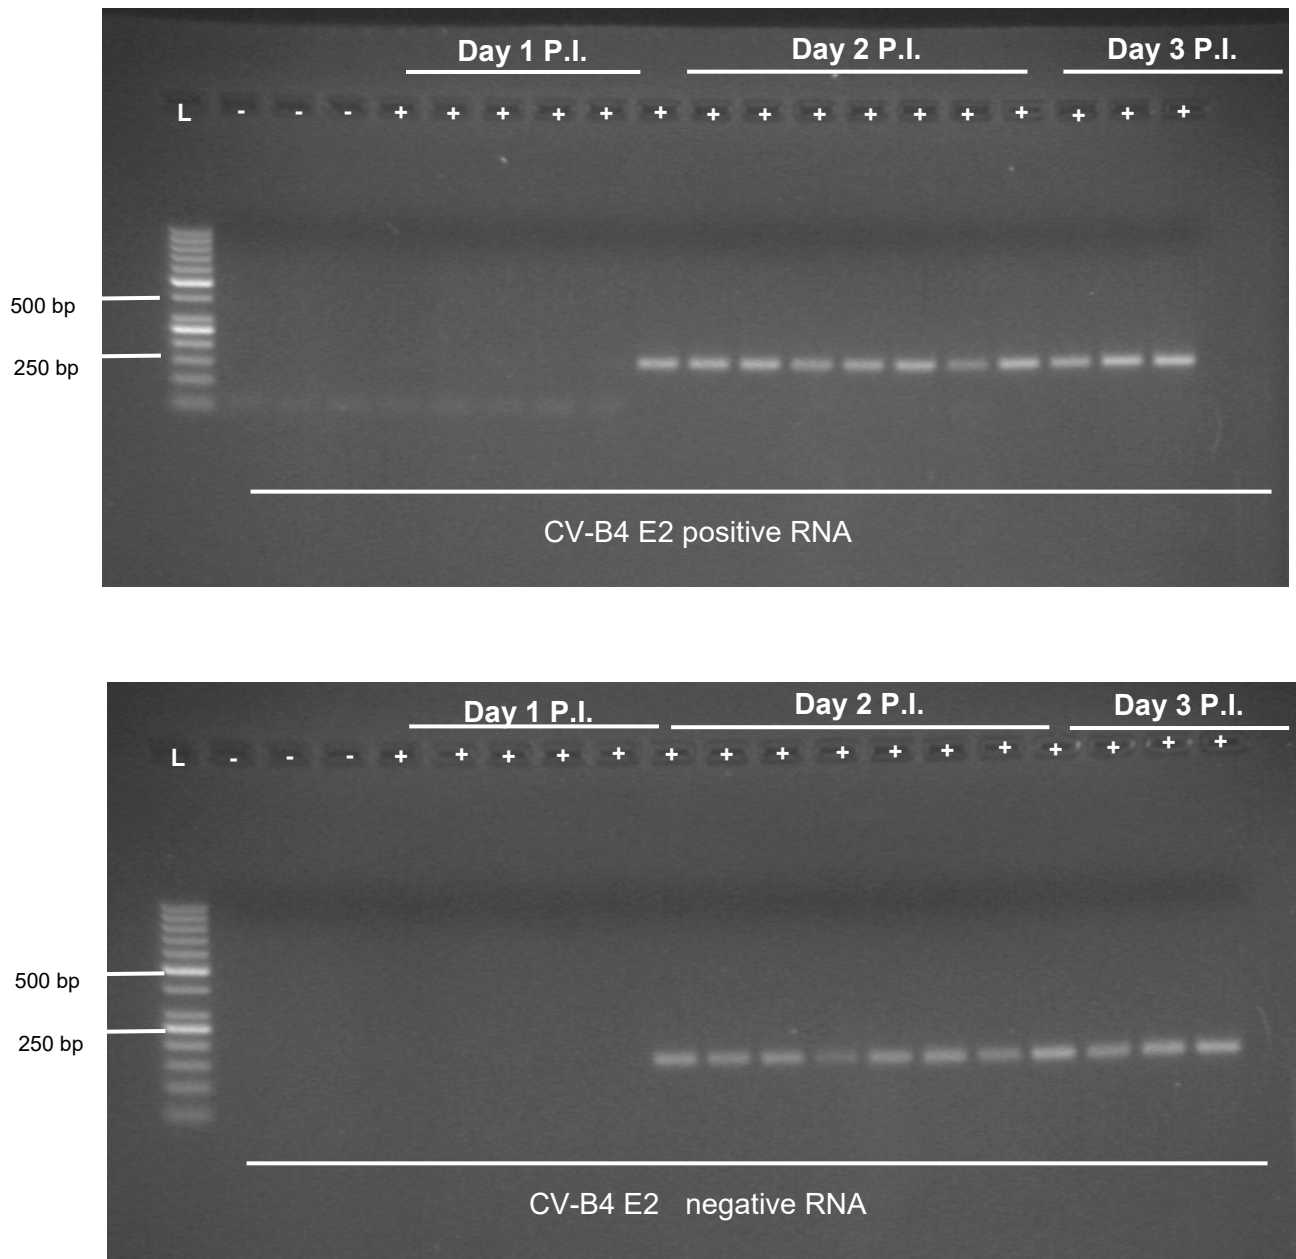

**Figure S3E.** Uncropped whole PCR gel for Figure 2D. L, O'GeneRuler 50 bp DNA ladder; (-): Mock-infected cells and (+): CV-B4-infected cells.

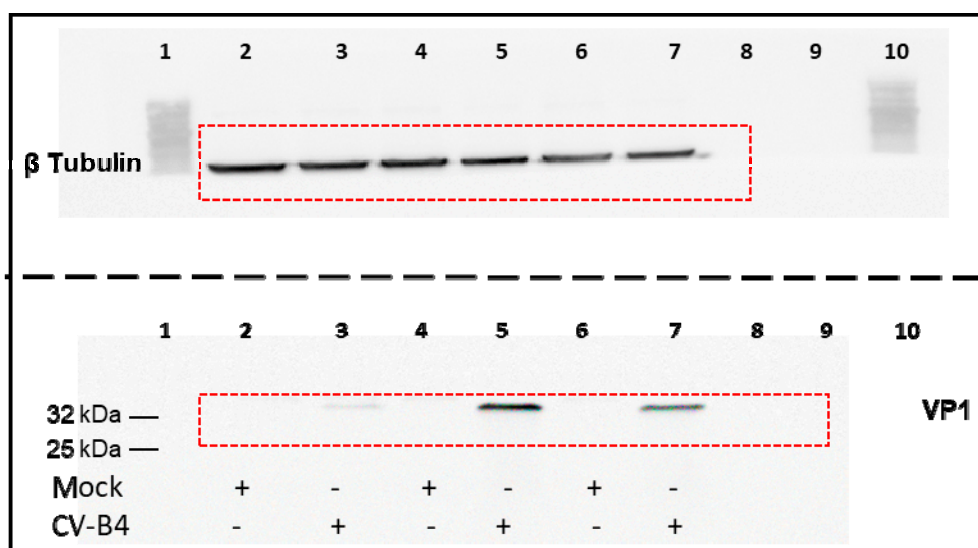

**Figure 3.** F. Full-length Western blot for Figure 2E. Membranes were cut horizontally into two parts prior to immunostaining for  $\beta$  Tubulin and VP1. Lanes 1 and 10, Color-coded Prestained Protein Marker, Broad Range (11–250 kDa). Lanes 2, 4, and 6: mock-infected cells; Lanes 3, 5, and 7: CV-B4 infected cells. Lanes 8 and 9, RIPA buffer only.

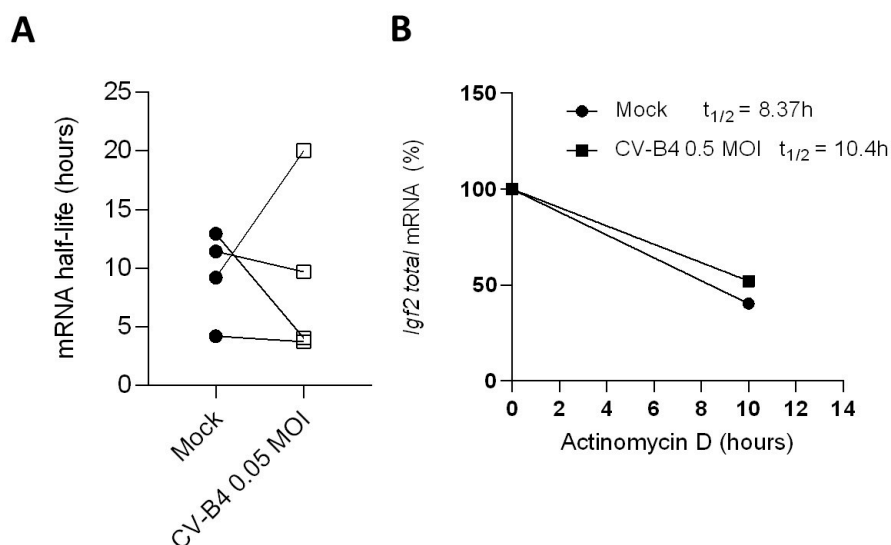

**Figure 4.** Effect of CV-B4 on *Igf2* transcript stability. (A) mRNA half-life of *Igf2* V3 transcripts in CV-B4 (MOI = 0.05) or mock-infected cells at day 2 P.I. followed by 2–10 hours of treatment with actinomycin D; lines connect both mock and CV-B4 mRNA half-life values obtained from the same experiment, ascending lines indicate an increase of mRNA half-life values and descending lines indicate a decrease of mRNA half-life values;  $n = 4$ . (B) Relative mRNA expression of *total Igf2* mRNA in mock- or in CV-B4-infected cells (MOI = 0.05) on day 2 P.I. followed by 10 hours of treatment with actinomycin D;  $n = 1$ . (A, B) A vehicle control was used for data normalization; (B) RT-qPCR was performed in parallel with standard plasmids with a known copy number for *total Igf2* and *Hprt*. The copy number of *Igf2* was normalized to that of *Hprt* for each sample. (A) Ratio paired t-test,  $p > 0.05$ .

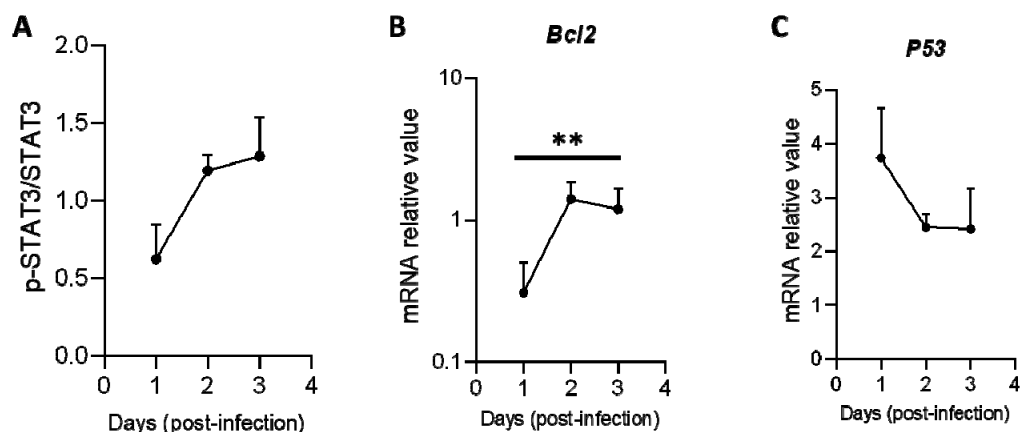

**Figure 5.** Parallel increase in signal transducer and activator of transcription 3 (STAT3)<sup>pY705</sup> with *Bcl2* in mock cells. (A) STAT3<sup>pY705</sup> relative quantification in mock-infected cells 1, 2, and 3 days P.I. Data are represented as mean  $\pm$  SEM, n = 4–5. (B) Relative mRNA expression of *Bcl2* and (C) *P53* mRNA in mock-infected MTE4-14 cells 1, 2, and 3 days P.I. Data are represented as mean of  $2^{-\Delta CT} \pm$  SEM; A–C, n = 3–6; one-way ANOVA, \*\* $p < 0.01$ .

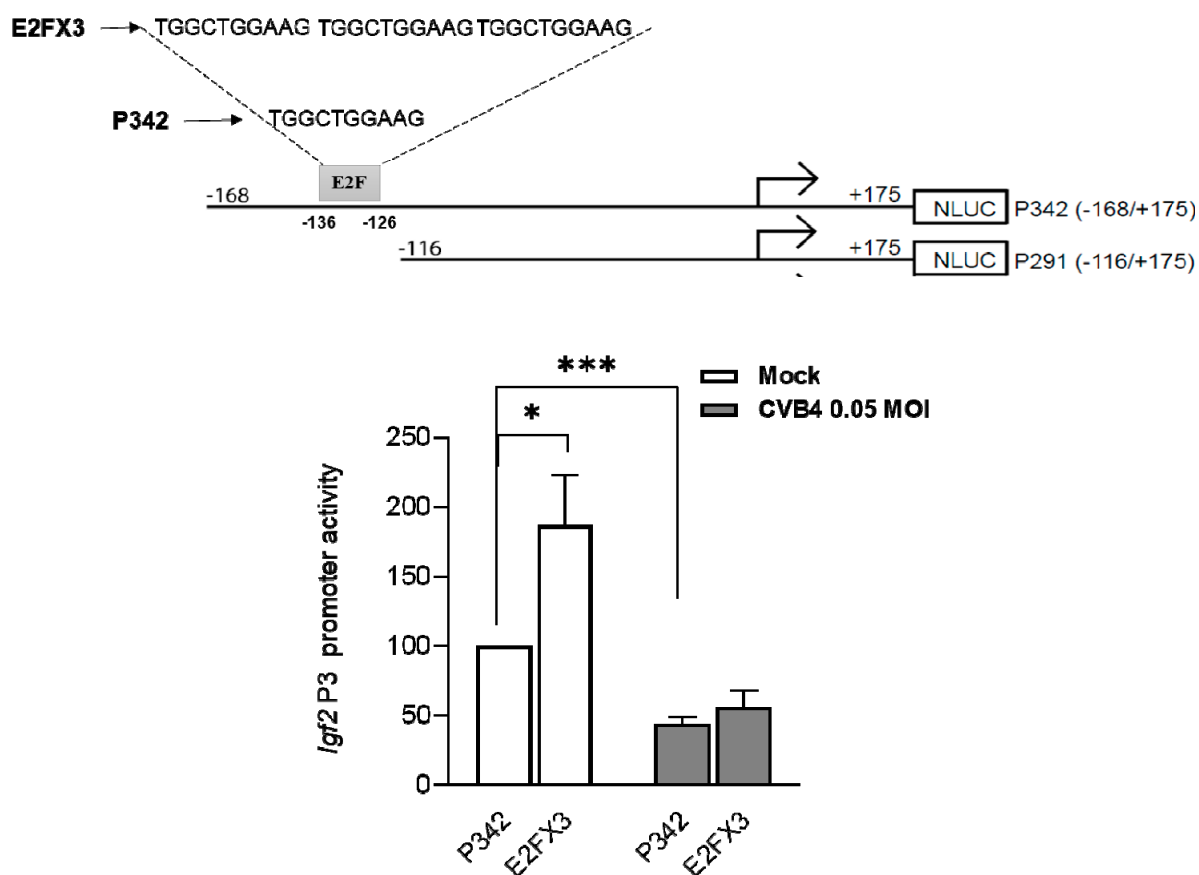

**Figure 6.** Effect of CV-B4 on *Igf2* P3 promoter with the E2FX3 construct. Top, schematic structure of *Igf2* P3 promoter with three sequential E2F binding sites (E2FX3) and wild type *Igf2* P3 (P342) with one E2F binding site. Bottom, Nanoluciferase relative activity of *Igf2* P3 promoter constructs on day 2 P.I. in CV-B4- (MOI = 0.05) or mock-infected cells transfected with the full *Igf2* P3 promoter construct (P342) or with *Igf2* P3 promoter containing three binding sites for E2F (E2FX3). The mean of the relative dual-luciferase activity normalized to mock is represented as  $\pm$  SEM. Mock-infected cells

transfected with the full *Igf2* P3 promoter (P342) is set at 100% in each experiment; n = 5–6. Ratio paired *t*-test, \**p* < 0.05 and \*\*\**p* < 0.001.

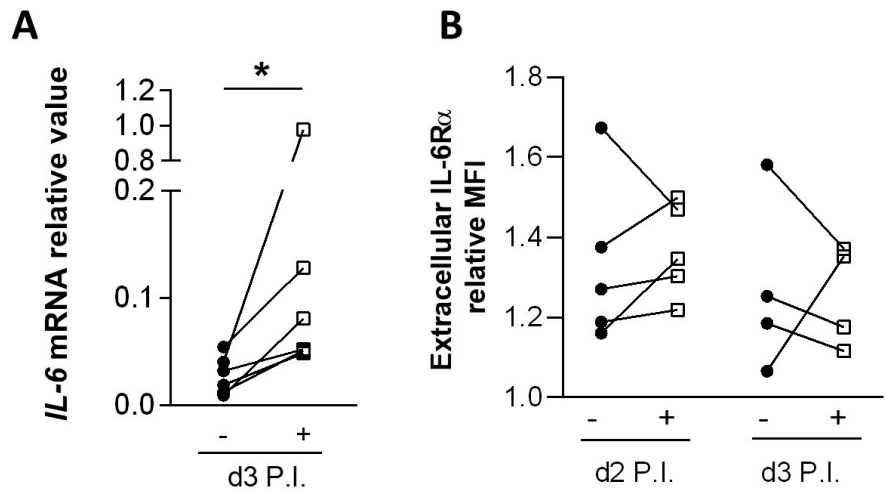

**Figure 7.** *Il6* mRNA relative expression and flow cytometry analysis of extracellular IL-6Rα in mock-(-) or in CV-B4-infected cells (+). (A) n = 6; Wilcoxon test, \**p* < 0.05. (B) Each relative Mean of Fluorescence Intensity (MFI) value represents MFI value of the sample divided by the corresponding isotype control MFI value; n = 4–5. Ratio paired *t*-test, *p* > 0.05.

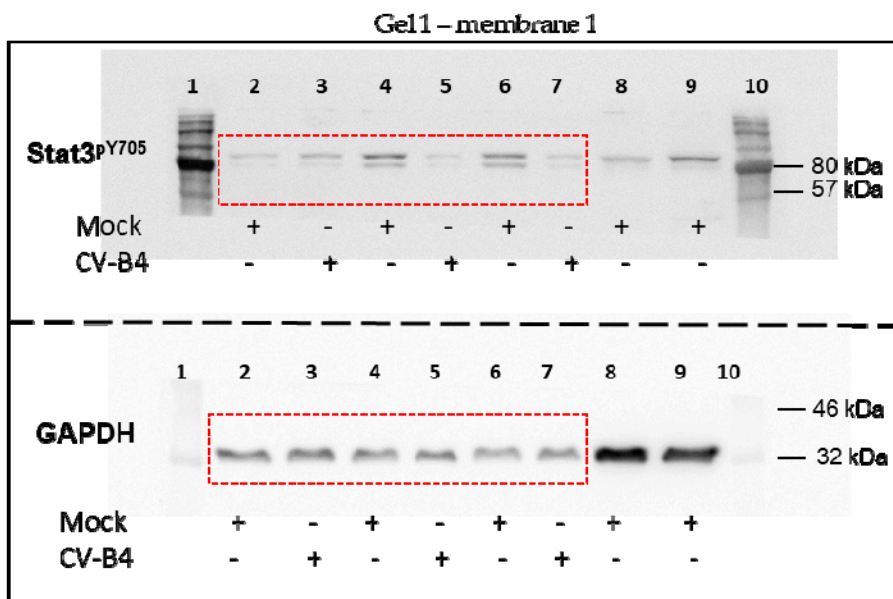



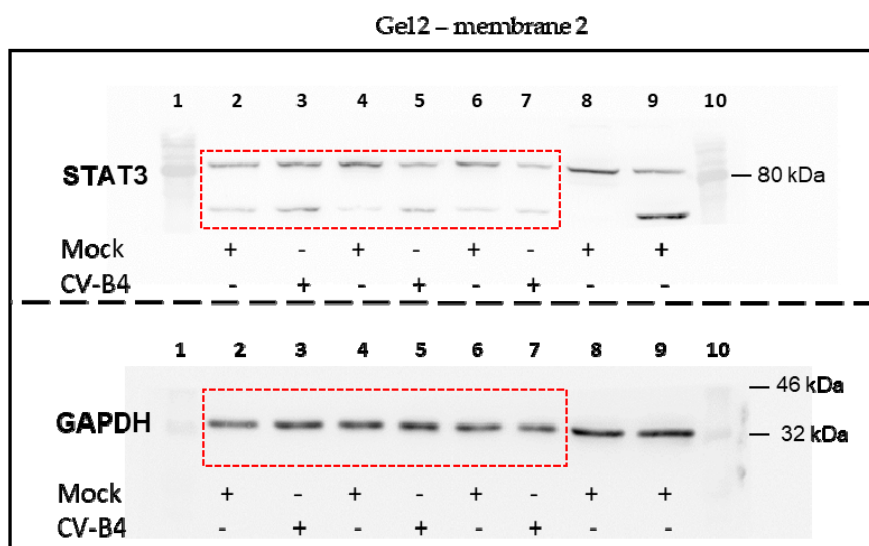

**Figure 8. A.** Full-length Western blot for Figure 5A. Membranes were cut horizontally into two parts prior to immunostaining of GAPDH and STAT3 (or STAT3<sup>pY705</sup> and GAPDH). Lanes 1 and 10, Color-coded Prestained Protein Marker, Broad Range (11–250 kDa). Lanes 2, 4, and 6: mock-infected cells; Lanes 3, 5, and 7: CV-B4 infected cells. Lane 8: mock-infected MTE4-14 cells; lane 9: mock-infected MTE4-14 cells stimulated with IL-6 for 30 min.

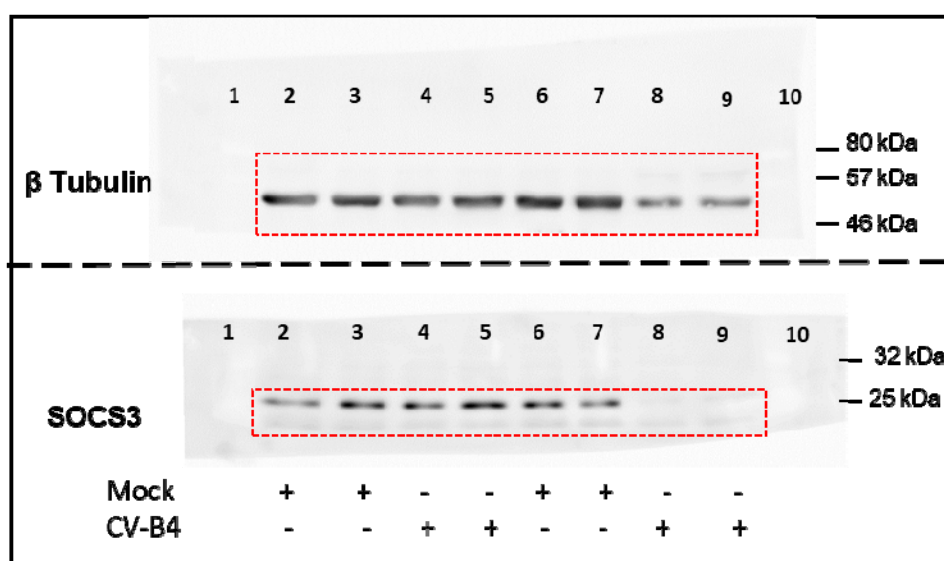

**Figure 8. B.** Full-length Western blot for Figure 5C. Membranes were cut horizontally into two parts prior to immunostaining for βTubulin and SOCS3. Lanes 1 and 10, Color-coded Prestained Protein Marker, Broad Range (11–250 kDa). Lanes 2, 3, 6, 7: mock-infected cells; lanes 4, 5, 8, 9: CV-B4-infected cells.

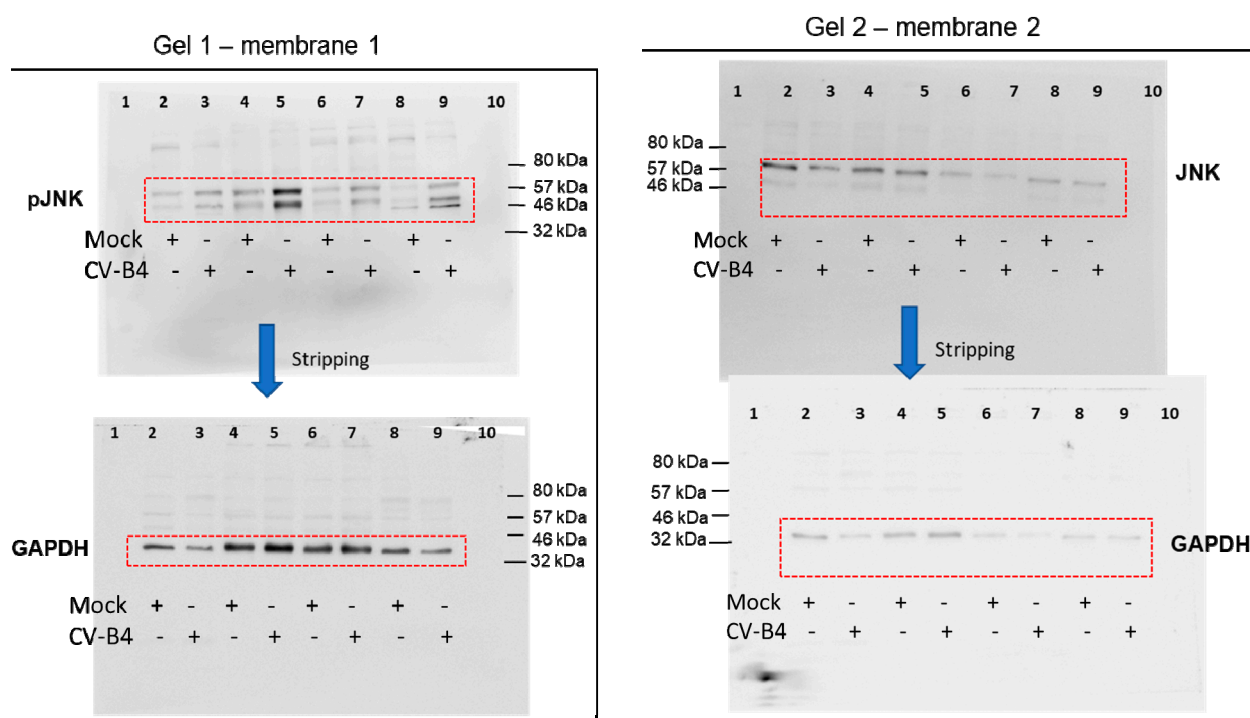

**Figure 8. C.** Full-length Western blot for Figure 5D. pJNK or JNK staining is performed followed by membrane stripping prior to GAPDH immunostaining. Lanes 1 and 10, Color-coded Prestained Protein Marker, Broad Range (11–250 kDa). Lanes 2, 4, 6, and 8: mock-infected cells; lanes 3, 5, 7, and 9: CV-B4-infected cells.

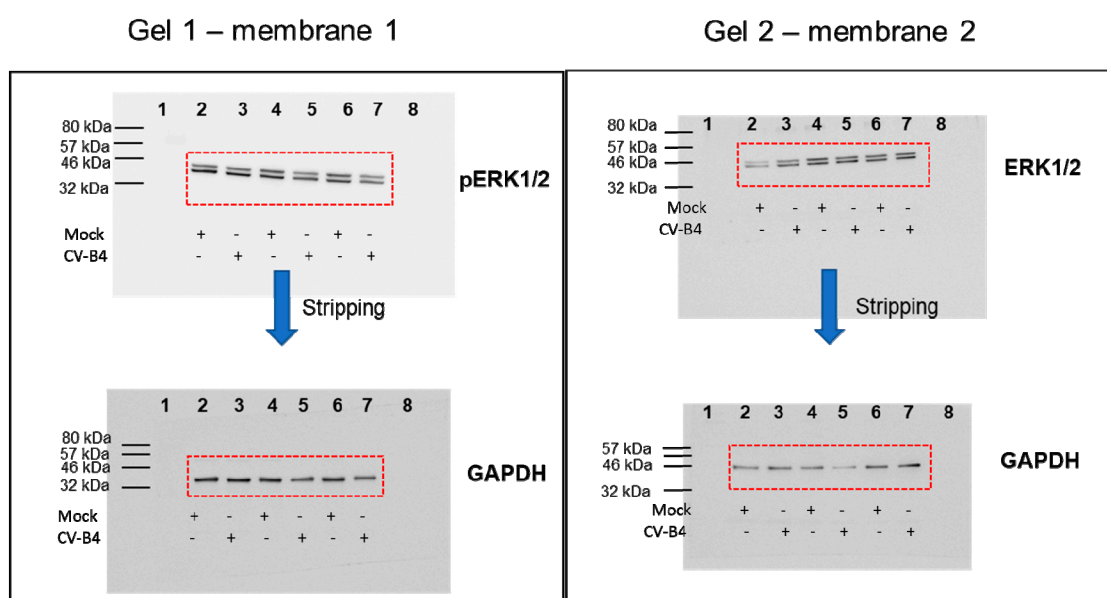

**Figure 8. D.** Full-length Western blot for Figure 5E. pERK or ERK staining is performed followed by membrane stripping prior to GAPDH immunostaining. Lanes 1 and 10, Color-coded Prestained Protein Marker, Broad Range (11–250 kDa). Lanes 2, 4, and 6: mock-infected cells; lanes 3, 5, and 7: CV-B4-infected cells.

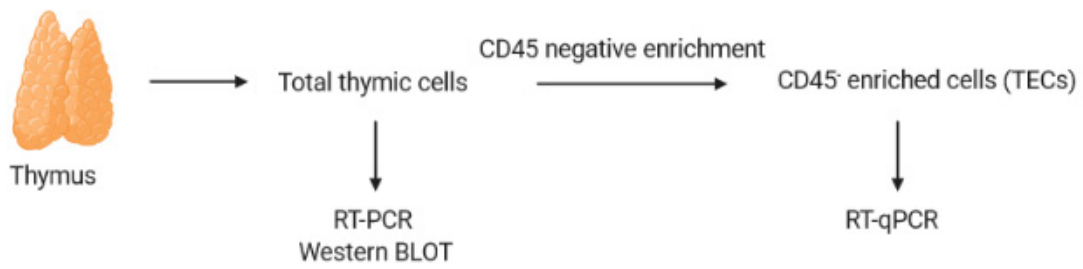

**Figure 9. A.** Thymus processing steps for isolation of total thymic cells (unsorted cells) and CD45-negative enriched cells (TECs).

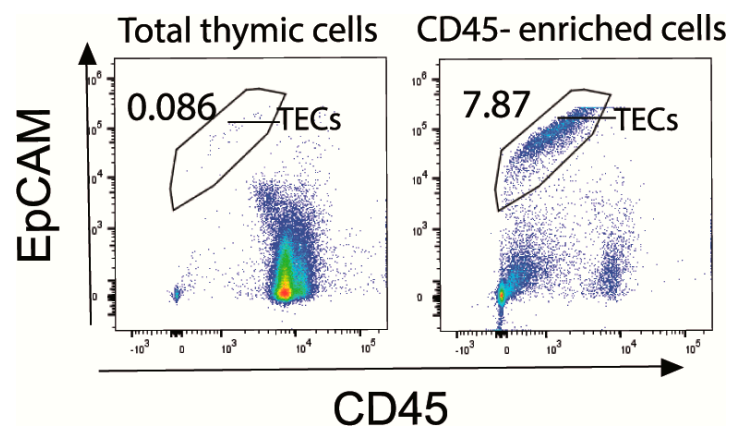

**Figure 9. B.** Flow cytometry analysis of CD45-negative enriched TECs (EpCAM+CD45<sup>-</sup>) versus the unsorted total thymic population. The numbers indicate the percentage of TECs population.

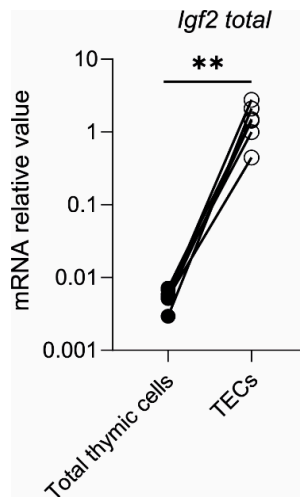

**Figure 9. C.** Relative mRNA expression of the *total Igf2* mRNA in the unsorted total thymic population and matched enriched TECs fraction (CD45<sup>-</sup>). Mock-inoculated mice (n = 6) on day 2 P.I. were used. Student’s *t*-test, \*\**p* < 0.01.

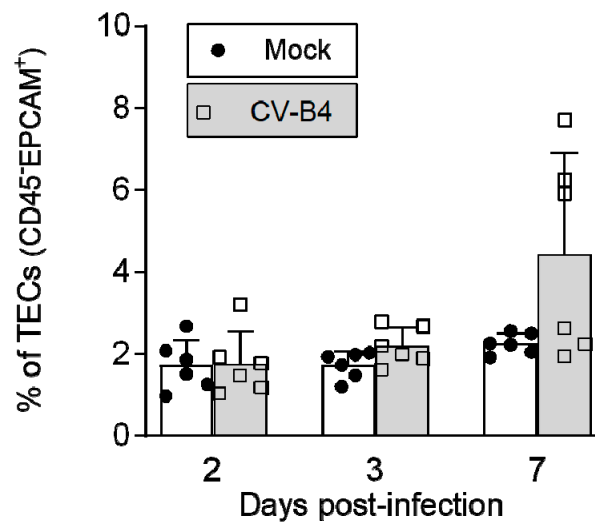

**Figure 9. D.** Flow cytometry analysis of total thymic cells 2, 3, and 7 days P.I. Gating strategy was performed as indicated in Figure S9B. Histogram represents the mean of relative value  $\pm$  SD; n = 6. Kruskal–Wallis test,  $p > 0,05$ .

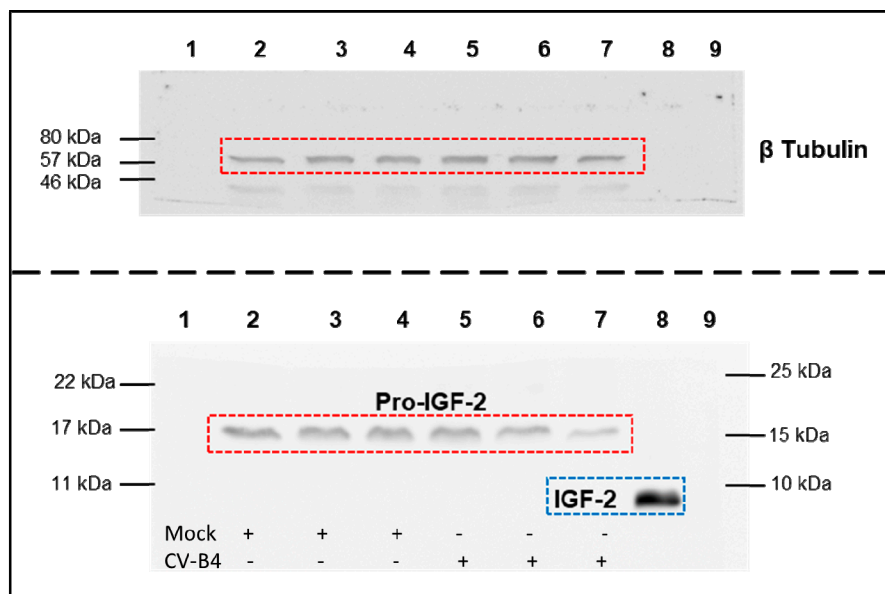

**Figure 9. E.** Full-length Western blot for Figure 6C. Membranes were cut horizontally into two parts prior to immunostaining for  $\beta$  Tubulin and IGF-2. Lane 1, Color-coded Prestained Protein Marker, Broad Range (11–250 kDa) and lane 9, Spectra™ Multicolor Low Range Protein Ladder). Lanes 2, 3, and 4: mock-inoculated mice; lanes 5, 6, and 7: CV-B4-inoculated mice. Lane 8, IGF-2 positive control.

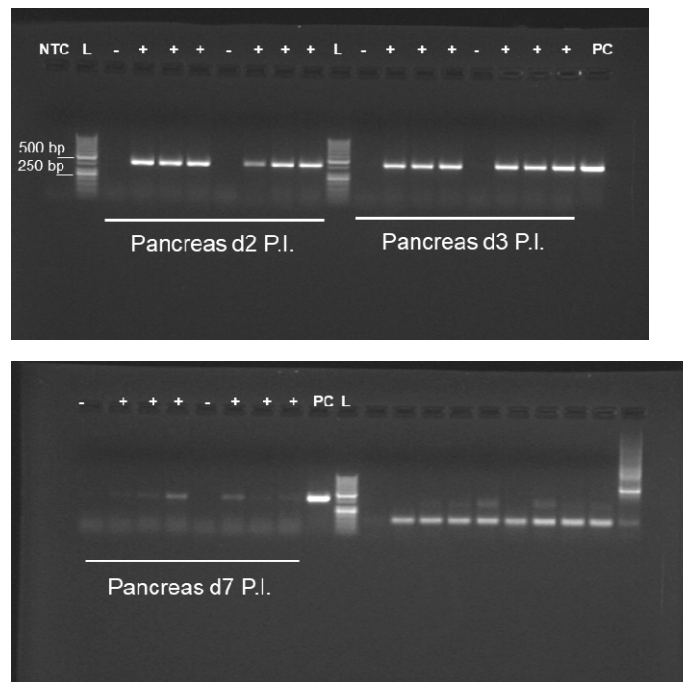

**Figure 9. F.** Uncropped whole PCR gels for Figure 6D. NTC, no template control; L, O’GeneRuler 50 bp DNA ladder; PC, positive control (MTE4-14 cells infected with CV-B4). (-): mock-inoculated mice and (+): CV-B4- inoculated mice. Undescribed wells are from an unrelated experiment.

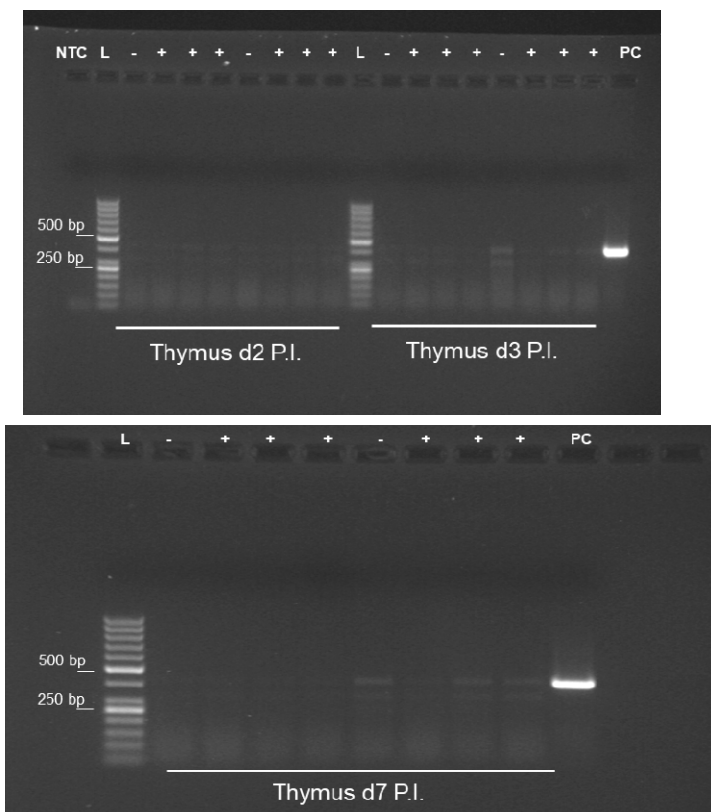

**Figure 9. F.** Uncropped whole PCR gels for Figure 6D. NTC, no template control; L, O’GeneRuler 50 bp DNA ladder; PC, positive control (MTE4-14 cells infected with CV-B4). (-): mock-inoculated mice and (+): CV-B4-inoculated mice. Undescribed wells are from an unrelated experiment.

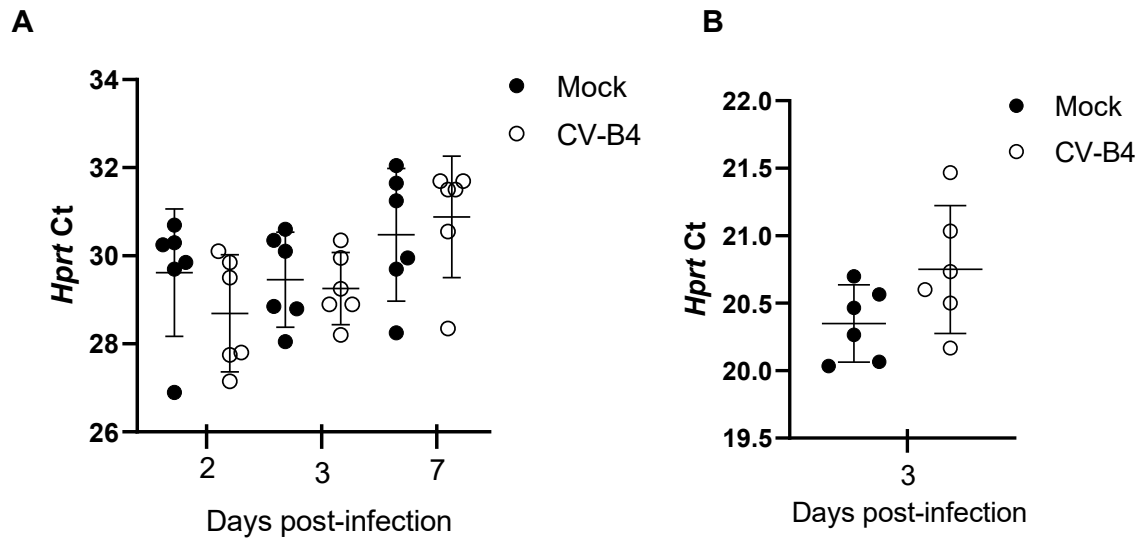

**Figure 10.** *Hprt* Cycle threshold in mice (A) and in MTE4-14 cells (B). (A), unpaired two-tailed t-test  $p > 0.05$  and (B) paired two-tailed t-test  $p > 0.05$ .

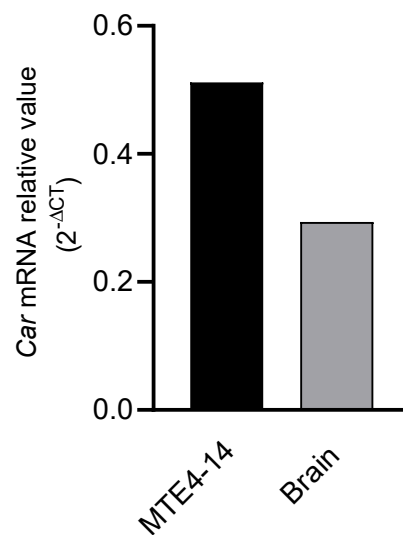

**Figure 11.** Coxsackievirus and adenovirus receptor (CAR) mRNA expression in MTE4-14 cells. The mean of  $2^{-\Delta CT}$  is shown,  $n = 1$ . Murine brain is used as the positive control. Gene expression is calculated based on the comparative Ct normalized to that of  $\beta$ -actin.

| Day 2 P.I. | Ct <i>Hprt</i> | Ct total <i>Igf2</i> | Ct <i>Igf2</i> V3 | Ct <i>Igf2</i> V1 | Ct <i>Igf2</i> V2 |
|------------|----------------|----------------------|-------------------|-------------------|-------------------|
| Mock n°1   | N/A            | 29,7                 | 31,0              | 31,4              | 34,4              |
|            | 29,7           | 29,8                 | 31,3              | 31,0              | 34,5              |
|            |                | 29,6                 | 30,7              | 32,3              |                   |
| Mock n°2   | 30             | 29,2                 | 30,7              | 31,1              | 32,8              |
|            | 29,7           | 29,4                 | 30,4              | 31,8              | 34,4              |

|                  |      |      |      |      |      |
|------------------|------|------|------|------|------|
|                  |      | 29,2 | 30,5 | 31,3 |      |
|                  | 27   | 28,0 | 31,0 | 29,6 | 32,7 |
| <b>Mock n°3</b>  | 26,8 | 28,0 | 30,8 | 29,7 | 31,8 |
|                  |      | 28,2 | 30,3 | 29,6 |      |
| <b>Mock n°4</b>  | 30   | 29,6 | 31,0 | 31,0 | 33   |
|                  | 31,4 | 29,6 | 30,4 | 31,0 | 32,5 |
|                  |      | 29,7 | 31,6 | 30,8 |      |
| <b>Mock n°5</b>  | 29,8 | 29,5 | 31,1 | 31,2 | 32,6 |
|                  | 30,7 | 29,8 | 31,6 | 31,3 | 32,6 |
|                  |      | 29,9 | 31,2 | 31,6 |      |
| <b>Mock n°6</b>  | 29,9 | 28,9 | 30,8 | 30,1 | 33,6 |
|                  | 30,7 | 28,9 | 30,7 | 29,8 | 35,2 |
|                  |      | 28,7 | 30,8 | 31,3 |      |
| <b>CV-B4 n°1</b> | 26,6 | 28,5 | 30,1 | 29,8 | 34,4 |
|                  | 27,7 | 28,6 | 30,5 | 30,1 | 33   |
|                  |      | 28,6 | 30,6 | 30,6 |      |
| <b>CV-B4 n°2</b> | 27,6 | 28,1 | 30,4 | 29,6 | 33,2 |
|                  | 28   | 28,7 | 30,1 | 30,0 | 32,7 |
|                  |      | 28,6 | 30,4 | 29,9 |      |
| <b>CV-B4 n°3</b> | 27,7 | 27,8 | 30,0 | 29,8 | 32,7 |
|                  | 27,8 | 27,9 | 30,2 | 29,3 | 32,9 |
|                  |      | 27,8 | 30,3 | 29,5 |      |
| <b>CV-B4 n°4</b> | 30,6 | 29,1 | 31,0 | 29,5 | 33,4 |
|                  | 29,1 | 28,2 | 31,0 | 30,3 | 33,6 |
|                  |      | 28,5 | 31,4 | 30,2 |      |
| <b>CV-B4 n°5</b> | 30   | 29,3 | 31,1 | 30,2 | 37,3 |
|                  | 30,2 | 29,5 | 31,1 | 31,2 | 36,8 |
|                  |      | 29,8 | 31,8 | 31,0 |      |
| <b>CV-B4 n°6</b> | 29,3 | 29,2 | 30,8 | 30,7 | 37,3 |
|                  | 29,7 | 29,3 | 31,3 | 31,5 | N/A  |
|                  |      | 29,3 | 31,2 | 30,6 |      |

| Day 3 P.I.      | Ct <i>Hprt</i> | Ct <i>total Igf2</i> | Ct <i>Igf2 V3</i> | Ct <i>Igf2 V1</i> | Ct <i>Igf2 V2</i> |
|-----------------|----------------|----------------------|-------------------|-------------------|-------------------|
| <b>Mock n°1</b> | 27,8           | 28,8                 | 31,6              | 30,7              | 33,6              |
|                 | 28,3           | 28,8                 | 31,5              | 30,6              | N/A               |
|                 |                | 28,5                 | 31,2              | 30,5              |                   |
| <b>Mock n°2</b> | 28,6           | 28,6                 | 30,4              | 31,7              | 34,3              |
|                 | 29,1           | 28,8                 | 30,8              | 32,0              |                   |

|                  |      |      |      |      |      |
|------------------|------|------|------|------|------|
|                  |      | 29,0 | 30,7 | 31,6 |      |
|                  | 28,7 | 28,8 | 31,2 | 30,9 | 34,1 |
| <b>Mock n°3</b>  | 28,9 | 28,6 | 30,9 | 31,0 |      |
|                  |      | 28,5 | 31,4 | 30,8 |      |
| <b>Mock n°4</b>  | 30,6 | 29,5 | 31,5 | 31,9 | 33,1 |
|                  | 30,6 |      | 30,7 | 32,8 | 33,4 |
|                  |      | 29,5 | 31,3 | 31,6 |      |
| <b>Mock n°5</b>  | 30,1 | 30,6 | 25,8 | 32,9 | 35,7 |
|                  | 30,1 | 30,8 | 26,1 | 32,8 | 34,4 |
|                  |      | 30,6 | 26,0 | 33,7 |      |
| <b>Mock n°6</b>  | 30,4 | 29,4 | 30,7 | 31,3 | 33,7 |
|                  | 30,3 | 29,5 | 31,0 | 31,7 | N/A  |
|                  |      | 29,5 | 31,7 | 32,2 |      |
| <b>CV-B4 n°1</b> | 27,6 | 28,3 | 30,5 | 29,9 | 32,7 |
|                  | 28,8 | 28,6 | 30,8 | 29,9 | 35   |
|                  |      | 28,4 | 30,1 | 30,4 |      |
| <b>CV-B4 n°2</b> | 28,8 | 27,0 | 30,3 | 29,0 | 31,8 |
|                  | 29   | 27,4 | 30,1 | 29,5 | 32,6 |
|                  |      | 27,4 | 30,5 | 29,2 |      |
| <b>CV-B4 n°3</b> | 28,8 | 28,3 | 31,2 | 29,5 | 32,8 |
|                  | 29   | 28,3 | 30,9 | 29,3 | 32,8 |
|                  |      | 28,0 | 30,7 | 29,6 |      |
| <b>CV-B4 n°4</b> | 28,9 | 28,6 | 27,7 | 29,8 | 32,5 |
|                  | 29,6 | 28,9 | 27,9 | 30,4 | 32,6 |
|                  |      | 28,8 | 28,0 | 30,7 |      |
| <b>CV-B4 n°5</b> | 30,1 | 29,6 | 30,4 | 30,3 | 34,2 |
|                  | 30,6 | 29,4 | 30,4 | 30,7 | N/A  |
|                  |      | 29,8 | 31,0 | 31,2 |      |
| <b>CV-B4 n°6</b> | 30   | 27,2 | 29,2 | 28,7 | 31,1 |
|                  | 29,9 | 27,0 | 29,6 | 29,3 | 31,8 |
|                  |      | 27,1 | 29,6 | 29,2 |      |

| Day 7 P.I.      | Ct <i>Hprt</i> | Ct <i>total Igf2</i> | Ct <i>Igf2 V3</i> | Ct <i>Igf2 V1</i> | Ct <i>Igf2 V2</i> |
|-----------------|----------------|----------------------|-------------------|-------------------|-------------------|
| <b>Mock n°1</b> | 30             | 29,4                 | 28,7              | 31,7              | 35,8              |
|                 | 29,9           | 29,6                 | 28,6              | 32,1              | 33,8              |
|                 |                | 29,7                 | 29,0              | 32,1              |                   |
| <b>Mock n°2</b> | 28             | 27,5                 | 27,2              | 29,8              | 30,6              |



| Sum of           | Total Igf2 | Igf2 V3 | Igf2 V1 | Igf2V2 |      |
|------------------|------------|---------|---------|--------|------|
|                  | 28,5       | 27,7    | 27,1    | 29,6   | 32,1 |
|                  |            | 27,6    | 27,3    | 30,2   |      |
| <b>Mock n°3</b>  | 31,2       | 30,3    | 30,3    | 33,2   | 34,5 |
|                  | 31,3       | 29,9    | 30,6    | 32,6   | 34,6 |
|                  |            | 29,7    | 30,6    | 32,7   |      |
| <b>Mock n°4</b>  | 29,9       | 29,2    | 30,8    | 30,7   | 33,1 |
|                  | 29,5       | 29,5    | 31,8    | 30,8   | 32,5 |
|                  |            | 29,4    | 31,4    | 31,3   |      |
| <b>Mock n°5</b>  | 31,6       | 29,8    | 31,4    | 31,5   | n/a  |
|                  | 31,7       | 29,8    | 30,3    | 31,9   | n/a  |
|                  |            | 30,3    | 30,7    | 32,1   |      |
| <b>Mock n°6</b>  | 32,1       | 30,6    | 30,6    | 33,2   | n/a  |
|                  | 32         | 30,7    | 30,6    | 33,0   | n/a  |
|                  |            | 31,2    | 30,6    | 32,6   |      |
| <b>CV-B4 n°1</b> | 28,3       | 27,8    | 25,9    | 32,5   | 34,3 |
|                  | 28,4       | 28,1    | 26,0    | 32,6   | 32,4 |
|                  |            | 28,2    | 26,0    | 33,6   |      |
| <b>CV-B4 n°2</b> | 32,4       | 30,2    | 27,9    | 33,8   | n/a  |
|                  | 30,6       | 30,5    | 28,0    | 33,1   | 36,3 |
|                  |            | 30,7    | 27,8    | 33,7   |      |
| <b>CV-B4 n°3</b> | 30,3       | 29,0    | 31,0    | 31,8   | 32,9 |
|                  | 30,8       | 29,4    | 31,6    | 32,5   | n/a  |
|                  |            | 29,1    | 30,9    | 31,6   |      |
| <b>CV-B4 n°4</b> | 31,2       | 30,6    | 30,7    | 30,2   | n/a  |
|                  | 31,8       | 31,1    | 30,3    | 30,5   | 35,8 |
|                  |            | 31,4    | 30,4    | 30,4   |      |
| <b>CV-B4 n°5</b> | 31,7       | 31,0    | 30,9    | 33,0   | 36,4 |
|                  | 31,7       | 31,1    | 30,9    | 32,0   | 35,8 |
|                  |            | 30,8    | 31,1    | 32,8   |      |
| <b>CV-B4 n°6</b> | 29,9       | 29,8    | 29,7    | 30,6   | 36,3 |
|                  | 29,9       | 29,8    | 29,8    | 31,1   | n/a  |
|                  |            | 29,4    | 30,0    | 31,2   |      |

|                            |            |            |            |            |
|----------------------------|------------|------------|------------|------------|
| Biological replicates used | 11 (day2)  | 11 (day 2) | 11 (day 2) | 11 (day 2) |
|                            | 12 (day 3) | 11 (day 3) | 12 (day 3) | 12 (day 3) |
|                            | 12 (day 7) | 11 (day 7) | 12 (day 7) | 10 (day 7) |

**Supplementary Table 1. Raw Ct of *Igf2* expression in Figure 6B at day 2, 3 and 7 P.I.** Grey, outlined sample or value deleted from analysis; n/a: under the limit of detection. The second table indicate the number of biological replicates used in the analysis of the experiment.

**Supplementary Table 2.** Putative transcription factor binding sites in the region -68/-22 and -168/-116.

| Murine <i>Igf2</i> P3 (-68 to -22) |             |                    |        |
|------------------------------------|-------------|--------------------|--------|
| Name                               | Motif ID    | GeneID             | Score  |
| Klf6                               | M08857_2.00 | ENSMUSG00000000078 | 16.87  |
| Klf4                               | M08857_2.00 | ENSMUSG00000003032 | 16.87  |
| Klf5                               | M08857_2.00 | ENSMUSG00000005148 | 16.87  |
| Klf7                               | M08857_2.00 | ENSMUSG00000025959 | 16.87  |
| Klf3                               | M08857_2.00 | ENSMUSG00000029178 | 16.87  |
| Klf1                               | M08857_2.00 | ENSMUSG00000054191 | 16.87  |
| Klf2                               | M08857_2.00 | ENSMUSG00000055148 | 16.87  |
| Klf12                              | M08857_2.00 | ENSMUSG00000072294 | 16.87  |
| Klf15                              | M08907_2.00 | ENSMUSG00000030087 | 16.49  |
| Sp1                                | M09016_2.00 | ENSMUSG00000001280 | 16.03  |
| Sp4                                | M09016_2.00 | ENSMUSG00000025323 | 16.03  |
| Sp3                                | M09016_2.00 | ENSMUSG00000027109 | 16.03  |
| Sp6                                | M09016_2.00 | ENSMUSG00000038560 | 16.03  |
| Sp8                                | M09016_2.00 | ENSMUSG00000048562 | 16.03  |
| Sp9                                | M09016_2.00 | ENSMUSG00000068859 | 16.03  |
| Sp5                                | M09016_2.00 | ENSMUSG00000075304 | 16.03  |
| Patz1                              | M08864_2.00 | ENSMUSG00000020453 | 15.798 |
| Zfp341                             | M08892_2.00 | ENSMUSG00000059842 | 15.256 |
| Zfp263                             | M08272_2.00 | ENSMUSG00000022529 | 14.357 |
| Klf8                               | M08871_2.00 | ENSMUSG00000041649 | 14.828 |
| Nkx2-1                             | M08136_2.00 | ENSMUSG00000001496 | 13.307 |
| Nkx2-5                             | M08136_2.00 | ENSMUSG00000015579 | 13.307 |
| Nkx2-2                             | M08136_2.00 | ENSMUSG00000027434 | 13.307 |

|        |             |                    |        |
|--------|-------------|--------------------|--------|
| Nkx2-6 | M08136_2.00 | ENSMUSG00000044186 | 13.307 |
| Nkx2-3 | M08136_2.00 | ENSMUSG00000044220 | 13.307 |
| Nkx2-4 | M08136_2.00 | ENSMUSG00000054160 | 13.307 |
| Nkx2-9 | M08136_2.00 | ENSMUSG00000058669 | 13.307 |

---

**Murine *Igf2* P3 (-168 to -116)**

| Name   | Motif ID    | GeneID             | Score  |
|--------|-------------|--------------------|--------|
| Zfp263 | M07844_2.00 | ENSMUSG00000022529 | 16.224 |
| Sp1    | M09016_2.00 | ENSMUSG00000001280 | 15.157 |
| Sp4    | M09016_2.00 | ENSMUSG00000025323 | 15.157 |
| Sp3    | M09016_2.00 | ENSMUSG00000027109 | 15.157 |
| Sp6    | M09016_2.00 | ENSMUSG00000038560 | 15.157 |
| Sp8    | M09016_2.00 | ENSMUSG00000048562 | 15.157 |
| Sp9    | M09016_2.00 | ENSMUSG00000068859 | 15.157 |
| Sp5    | M09016_2.00 | ENSMUSG00000075304 | 15.157 |
| Patz1  | M08287_2.00 | ENSMUSG00000020453 | 14.129 |
| Zfp263 | M08082_2.00 | ENSMUSG00000022529 | 14.251 |
| E2f4   | M09034_2.00 | ENSMUSG00000014859 | 14.084 |
| E2f3   | M09034_2.00 | ENSMUSG00000016477 | 14.084 |
| E2f2   | M09034_2.00 | ENSMUSG00000018983 | 14.084 |
| E2f1   | M09034_2.00 | ENSMUSG00000027490 | 14.084 |
| E2f5   | M09034_2.00 | ENSMUSG00000027552 | 14.084 |
| E2f6   | M09034_2.00 | ENSMUSG00000057469 | 14.084 |
| Sall4  | M08866_2.00 | ENSMUSG00000027547 | 13.786 |
| Prdm5  | M08986_2.00 | ENSMUSG00000029913 | 13.783 |
| Fev    | M09055_2.00 | ENSMUSG00000055197 | 13.617 |
| Etv3   | M09055_2.00 | ENSMUSG00000003382 | 13.617 |
| Etv1   | M09055_2.00 | ENSMUSG00000004151 | 13.617 |
| Etv2   | M09055_2.00 | ENSMUSG00000006311 | 13.617 |
| Elk3   | M09055_2.00 | ENSMUSG00000008398 | 13.617 |
| Gabpa  | M09055_2.00 | ENSMUSG00000008976 | 13.617 |

|        |             |                    |        |
|--------|-------------|--------------------|--------|
| Elk1   | M09055_2.00 | ENSMUSG00000009406 | 13.617 |
| Etv5   | M09055_2.00 | ENSMUSG00000013089 | 13.617 |
| Fli1   | M09055_2.00 | ENSMUSG00000016087 | 13.617 |
| Etv4   | M09055_2.00 | ENSMUSG00000017724 | 13.617 |
| Ets2   | M09055_2.00 | ENSMUSG00000022895 | 13.617 |
| Elk4   | M09055_2.00 | ENSMUSG00000026436 | 13.617 |
| Elf4   | M09055_2.00 | ENSMUSG00000031103 | 13.617 |
| Ets1   | M09055_2.00 | ENSMUSG00000032035 | 13.617 |
| Elf1   | M09055_2.00 | ENSMUSG00000036461 | 13.617 |
| Elf2   | M09055_2.00 | ENSMUSG00000037174 | 13.617 |
| Erg    | M09055_2.00 | ENSMUSG00000040732 | 13.617 |
| Erf    | M09055_2.00 | ENSMUSG00000040857 | 13.617 |
| Zfp383 | M07689_2.00 | ENSMUSG00000099689 | 13.452 |
| Maz    | M08988_2.00 | ENSMUSG00000030678 | 13.087 |
| Zfp281 | M08999_2.00 | ENSMUSG00000041483 | 13.023 |

---
